# Supplementary material for: Therapeutic silencing of fat-specific protein 27 improves glycemic control in mouse models of obesity and insulin resistance
Source: PubMed Central journal article supplement (PMC5234712; doi:10.1194/jlr.m069799), 2016-12-29
Supplement: 10.1194_M069799_jlr.M069799-1.pdf [file 10.1194_M069799_jlr.M069799-1.pdf]

Supplemental Information

**Therapeutic silencing of *Fsp27* improves glycemic control  
in mouse models of obesity and insulin resistance**

Cédric Langhi<sup>1</sup>, Noemí Arias<sup>1</sup>, Ananthi Rajamoorthi<sup>1</sup>, Jeannine Basta<sup>2</sup>,  
Richard G. Lee<sup>3</sup>, and Ángel Baldán<sup>1,4,5</sup>

<sup>1</sup>Edward A. Doisy Department of Biochemistry & Molecular Biology, Saint Louis University, Saint Louis, MO 63104; <sup>2</sup>Department of Internal Medicine, Saint Louis University, Saint Louis, MO 63104; <sup>3</sup>Cardiovascular Group, Antisense Drug Discovery, Ionis Pharmaceuticals, Carlsbad, CA 92010; <sup>4</sup>Center for Cardiovascular Research, and <sup>5</sup>Liver Center, Saint Louis University, Saint Louis, MO 63104

Supplemental Figures S1, S2, S3, S4  
Supplemental Table S1

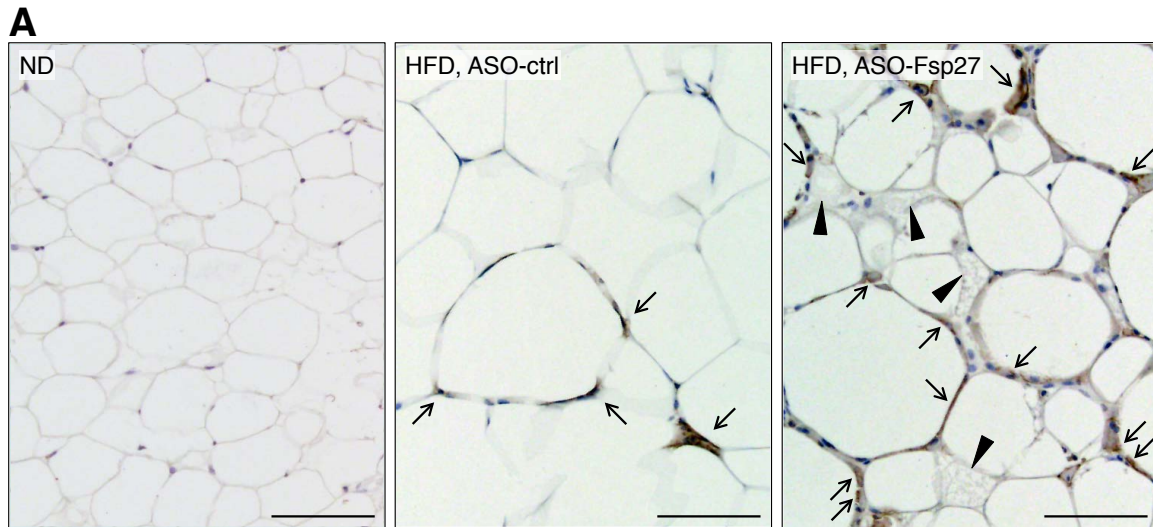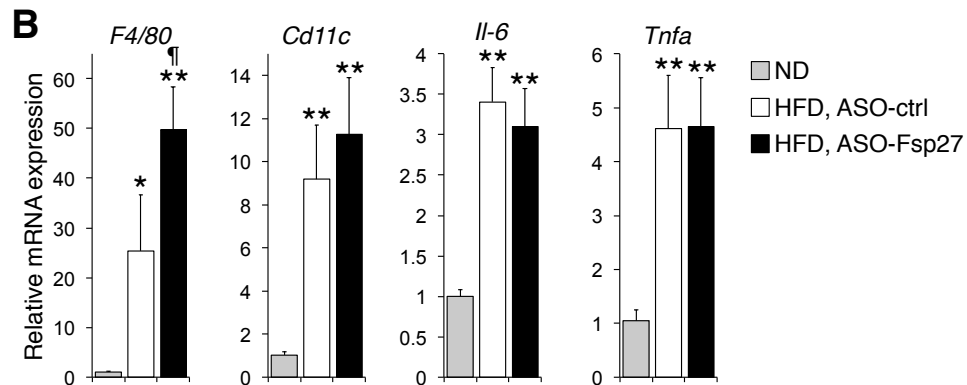

**Supplemental Figure S1.** Increased infiltration of macrophages into the eWAT of ASO-Fsp27 treated mice. C57BL/6 mice were fed normal diet (ND; gray bars), or high-fat diet (HFD) plus treatment with ASO-ctrl or ASO-Fsp27 (white and black bars, respectively), as shown in Fig. 1A. (A) Representative immunohistochemistry micrographs of tissue sections using an F4/80 antibody. Brown precipitate is noted in infiltrating macrophages (arrows). Multilocular adipocytes (arrowheads) were noted only in ASO-Fsp27 treated mice. (B) Relative mRNA expression of selected markers associated to pro-inflammatory M1-like macrophages. Data are shown as mean  $\pm$  s.e.m (n=6). \* $P \leq 0.05$  and \*\* $P \leq 0.01$ , HFD vs. ND. † $P \leq 0.05$ , ASO-Fsp27 vs. ASO-ctrl.

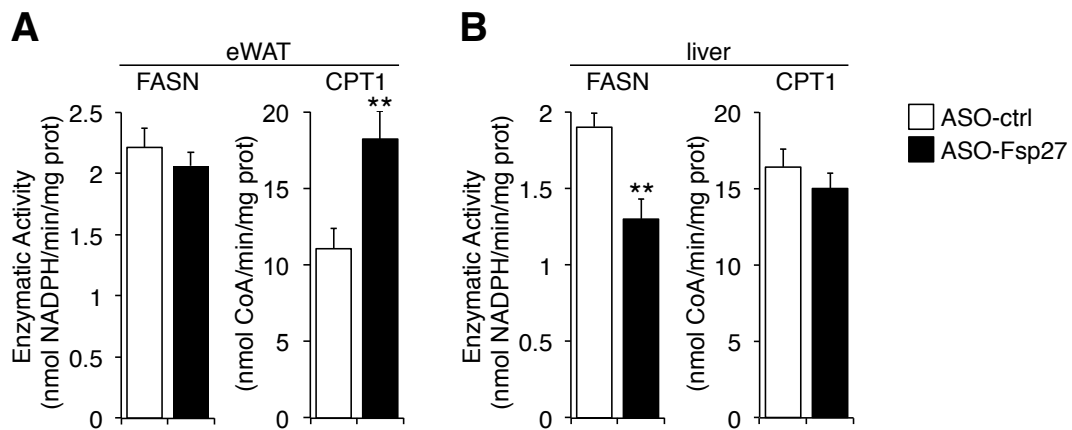

**Supplemental Figure S2.** Enzymatic activities of FASN and CPT1 in eWAT and liver in HFD-fed C57BL/6 mice treated with ASO-FSp27. Animals were treated with ASO-ctrl or ASO-Fsp27, as shown in Fig. 1A. Enzymatic activities in extracts from eWAT (A) and liver (B) were determined as described in methods. Data are shown as mean  $\pm$  s.e.m (n=6). \*\* $P \leq 0.01$ , ASO-Fsp27 vs. ASO-ctrl.

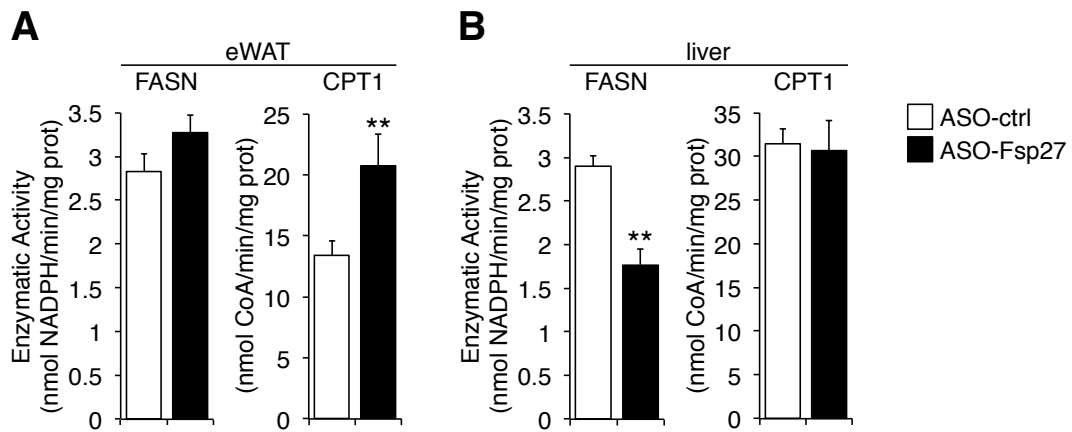

**Supplemental Figure S3.** Enzymatic activities of FASN and CPT1 in eWAT and liver in chow-fed *ob/ob* mice treated with ASO-FSp27. Animals were treated with ASO-ctrl or ASO-Fsp27, as shown in Fig. 3A. Enzymatic activities in extracts from eWAT (A) and liver (B) were determined as described in methods. Data are shown as mean  $\pm$  s.e.m (n=6). \*\* $P \leq 0.01$ , ASO-Fsp27 vs. ASO-ctrl.

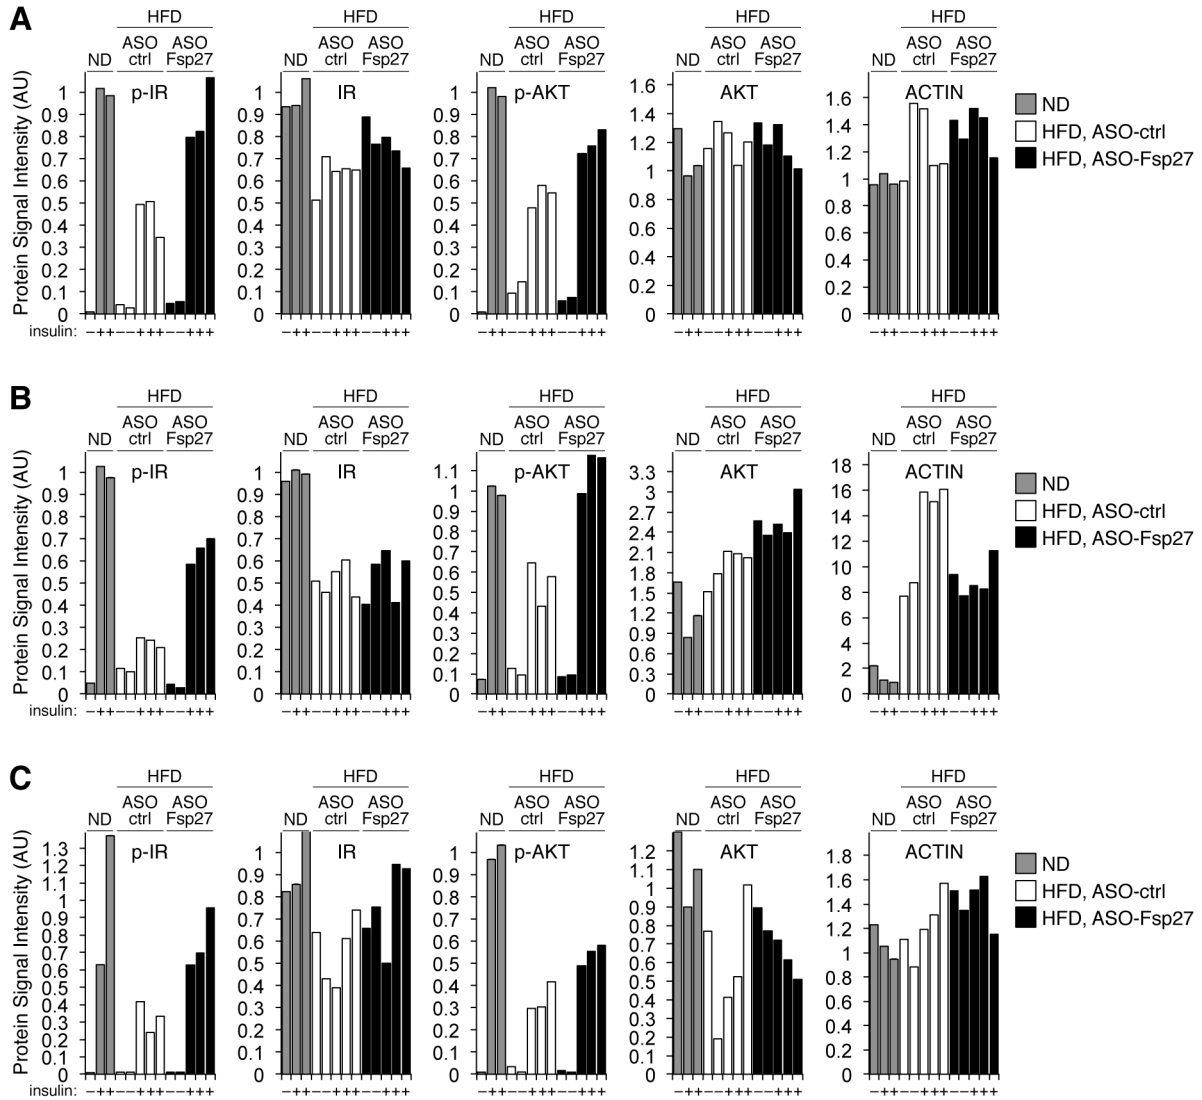

**Supplemental Figure S4.** Improved insulin sensitivity in mice treated with ASO-Fsp27. Quantification of immunoblots signal intensities shown in Fig. 5D–F.

| <b>Transcript</b> | <b>Forward primer</b>   | <b>Reverse primer</b>      |
|-------------------|-------------------------|----------------------------|
| <i>36b4</i>       | GGTGCCTCTGGAGATTTTCG    | CACTGGTCTAGGACCCGAGAAG     |
| <i>Acc</i>        | TGACAGACTGATCGCAGAGAAAG | TGGAGAGCCCCACACACA         |
| <i>Acox</i>       | CAGCAGGAGAAATGGATGCA    | GGGCGTAGGTGCCAATTATCT      |
| <i>Adipoq</i>     | GGAGAGAAAGGAGATGCAGGT   | CTTTCCTGCCAGGGGTTTC        |
| <i>Atgl</i>       | GCCTCCTTGGACACCTCAATAA  | CTTCCCTCGGGGTCTACCACA      |
| <i>Cidea</i>      | CTCCGAGTACTGGGCGATAC    | ACCAGCCTTTGGTGCTAGG        |
| <i>Cideb</i>      | CTGCCAGCCTCCAAGAACT     | TAGCACTCCACGTAGCAGCA       |
| <i>Cox4</i>       | TCACTGCGCTCGTTCTGAT     | CGATCGAAAGTATGAGGGATG      |
| <i>Cpt1a</i>      | TGAGTGGCGTCCTCTTTGG     | CAGCGAGTAGCGCATAGTCATG     |
| <i>Cpt1b</i>      | GAGTGACTGGTGGGAAGAATATG | GCTGCTTGACATTTGTGTT        |
| <i>Dio2</i>       | CTGCGCTGTGTCTGGAAC      | GGAGCATCTTCACCCAGTTT       |
| <i>Hmgcr</i>      | CTTGTGGAATGCCTTGTGATTG  | AGCCGAAGCAGCACATGAT        |
| <i>Hsl</i>        | TTCTCCAAAGCACCTAGCCAA   | TGTGGAAAACCTAAGGGCTTGTTG   |
| <i>Ldlr</i>       | AGGCTGTGGGCTCCATAGG     | TGCGGTCCAGGGTCATCT         |
| <i>Fasn</i>       | GCTGCGGAACTTCAGGAAAT    | AGAGACGTGTCACTCCTGGACTT    |
| <i>Fsp27</i>      | GGCTCACAGCTTGGAGGA      | CTCCACGATTGTGCCATCT        |
| <i>Mcad</i>       | TTACCGAAGAGTTGGCGTATG   | ATCTTCTGGCCGTTGATAACA      |
| <i>Pcsk9</i>      | GAAGACCGCTCCCCTGAT      | GCACCCTGGATGCTGGTA         |
| <i>Plin1</i>      | GCTGCTTTCTCGGTGTTACAG   | GAGCAGGTTTCTCCTGCTCA       |
| <i>Plin2</i>      | CCTCAGCTCTCCTGTTAGGC    | CACTACTGCTGCTGCCATTT       |
| <i>Plin3</i>      | CCACAGGATGCTGAAAAGG     | TGATGTCCCTGAACATGCTG       |
| <i>Plin4</i>      | GGACTTACAAACAGCAACAGACC | TCTGTGAGTTGGTGGACACTTT     |
| <i>Plin5</i>      | ACATGGTGCTGGGCAAGT      | TCAGCTGCCAGGACTGCTA        |
| <i>Ppara</i>      | CACCTGCAGAGCAACCATC     | CCGAAGGTCCACCATTTTT        |
| <i>Retn</i>       | TTCCTTGTCCCTGAACTGCT    | CCAATGTTCTTTATTGCATTTGG    |
| <i>Scd1</i>       | CCGGAGACCCCTTAGATCGA    | TAGCCTGTAAAAGATTTCTGCAAACC |
| <i>Srebp1c</i>    | GGAGCCATGGATTGCACATT    | GGCCCGGGAAGTCACTGT         |
| <i>Srebp2</i>     | GCGTTCTGGAGACCATGGA     | ACAAAGTTGCTCTGAAAACAAATCA  |
| <i>Ucp1</i>       | GGCCTCTACGACTCAGTCCA    | TAAGCCGGCTGAGATCTTGT       |

**Supplemental Table S1.** Oligonucleotides used in qPCR studies.
